# Supplementary material for: Anion and Cation Co-Modified Vanadium Oxide for Cathode Material of Aqueous Zinc-Ion Battery
Source: MDPI journal article supplement (doi:10.3390/batteries9070352), 2023-07-02
Supplement: s1 [file s1]

## **Supplementary Materials**

### **Anion and Cation Co-Modified Vanadium Oxide for Cathode**

#### **Material of Aqueous Zinc-Ion Battery**

Xueqi Zhang<sup>1</sup>, Ruilin Bian<sup>1</sup>, Zhiyuan Sang<sup>1</sup>, Shandong Tan<sup>1</sup>, Ji Liang<sup>1</sup>, Liquan Wang<sup>2,\*</sup>  
and Feng Hou<sup>1,\*</sup>

1 Key Laboratory of Advanced Ceramics and Machining Technology of the Ministry  
of Education, School of Materials Science and Engineering, Tianjin University,  
Tianjin 300072, China.

2 Applied Physics Department, College of Physics and Materials Science, Tianjin  
Normal University, Tianjin 300387, China

## Supplementary Results

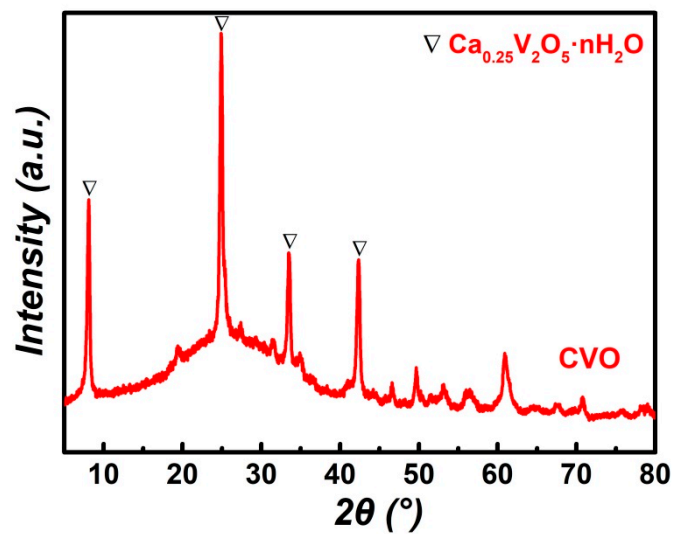

**Figure S1.** XRD spectrum of the synthesized CVO powder.

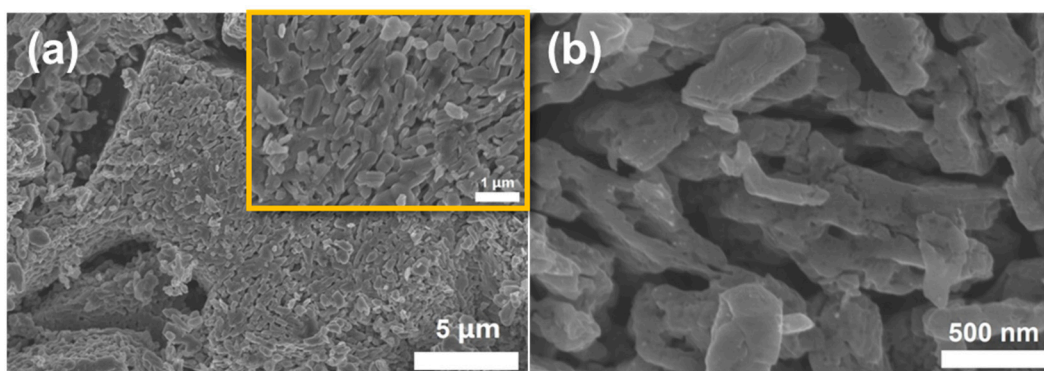

**Figure S2.** SEM images of (a)  $\text{V}_2\text{O}_5$  powder and (b) VNO.

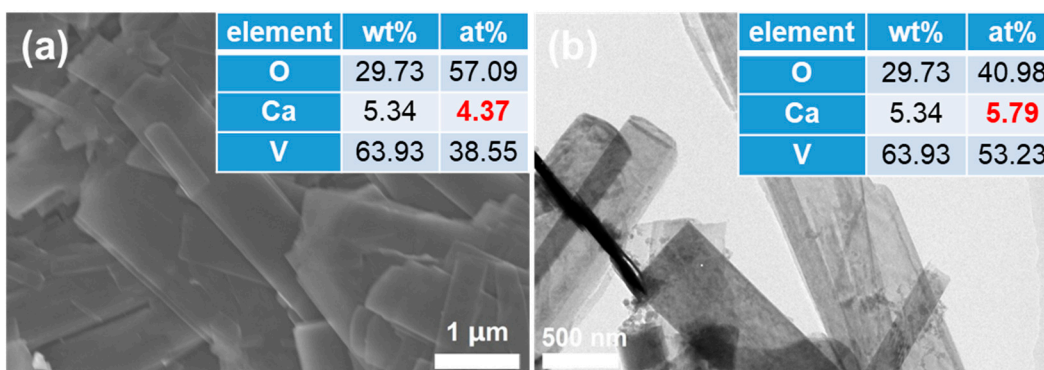

**Figure S3.** (a) SEM image and (b) TEM image with element content of CVO.

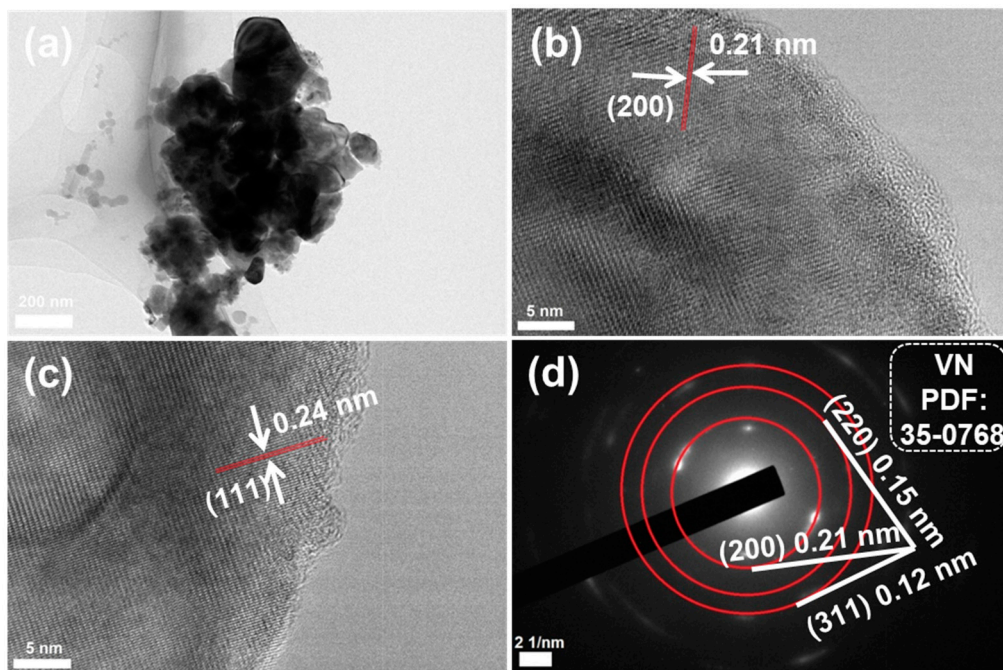

**Figure S4.** (a) TEM image, (b,c) HRTEM image, and (d) SAED image of the synthesized VNO powder.

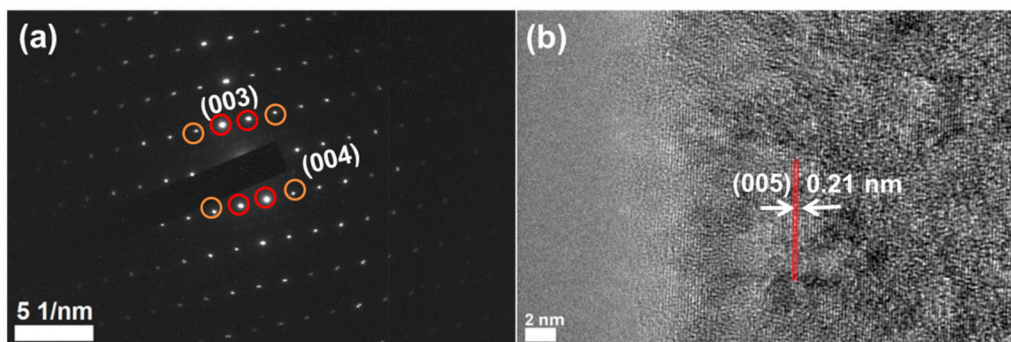

**Figure S5.** (a) SAED image and (b) HRTEM image of the synthesized CVO powder.

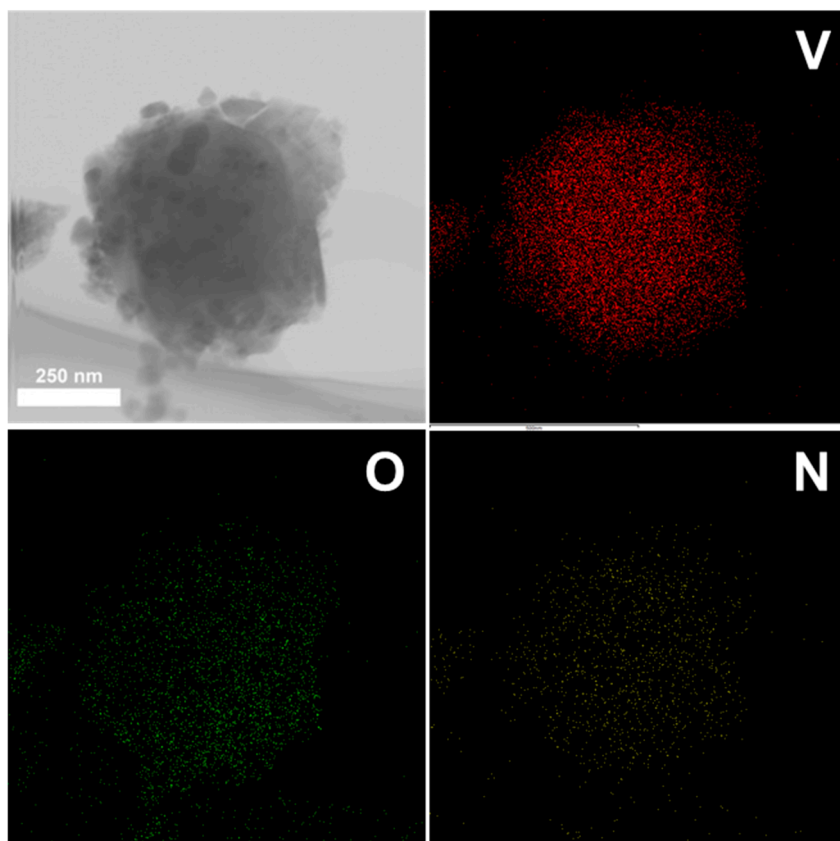

**Figure S6.** EDS elemental mappings of the synthesized VNO powder.

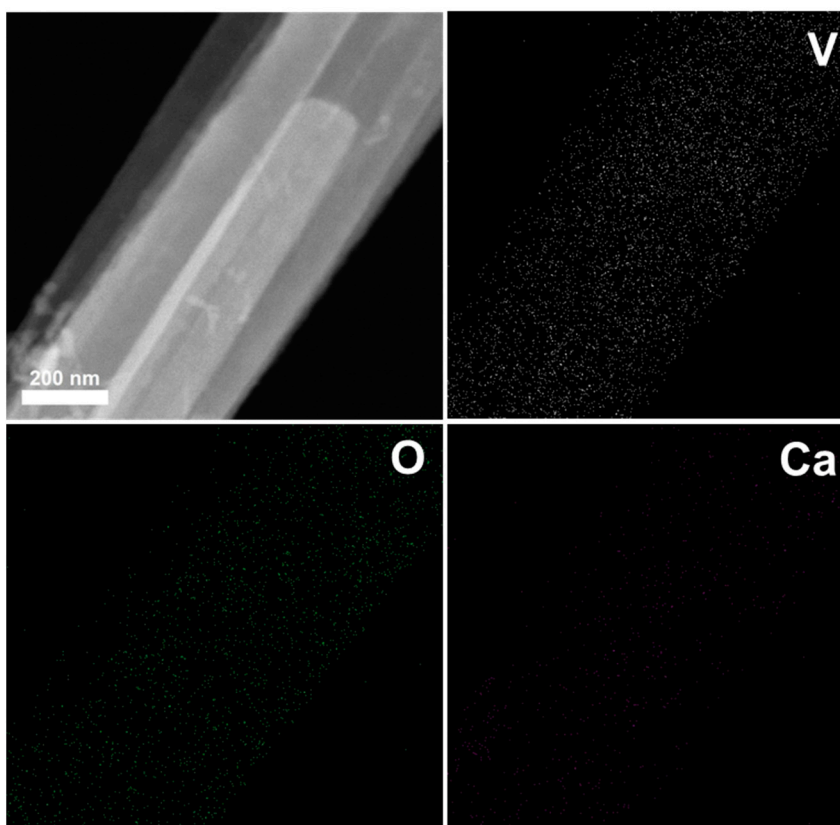

**Figure S7.** EDS elemental mappings of the synthesized CVO powder.

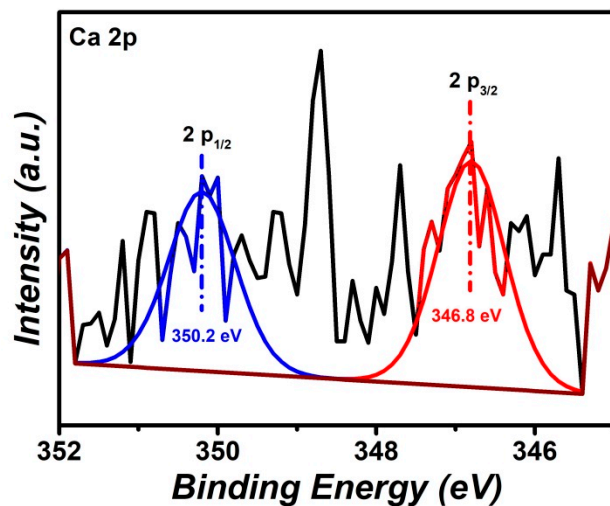

**Figure S8.** High-resolution XPS spectrum of Ca 2p of CVNO.

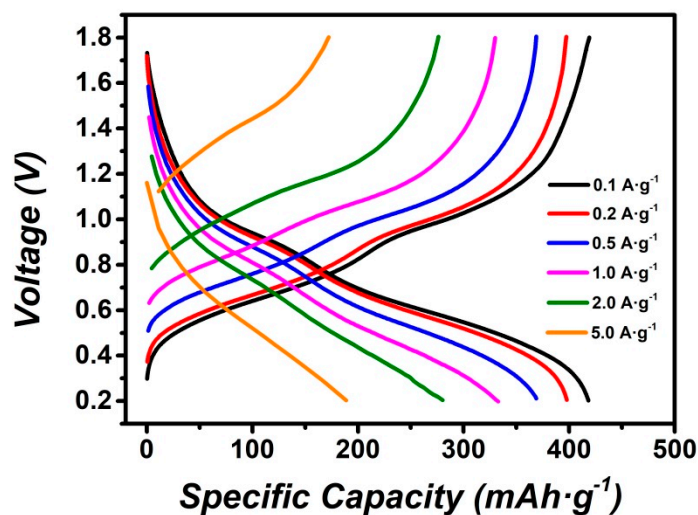

**Figure S9.** GCD curves of CVNO at different current densities.

**Table S1.** Electrochemical performance in related studies.

| Materials                                                             | Specific capacity                                                          | Cycling stability                                                      | References |
|-----------------------------------------------------------------------|----------------------------------------------------------------------------|------------------------------------------------------------------------|------------|
| $\text{Ca}_{0.24}\text{V}_2\text{O}_5 \cdot 0.83\text{H}_2\text{O}$   | 340 $\text{mAh} \cdot \text{g}^{-1}$ at 0.2 C                              | 96% retention after<br>3000 cycles at 80 C                             | [1]        |
| $\text{Mg}_{0.34}\text{V}_2\text{O}_5 \cdot 0.84\text{H}_2\text{O}$   | 353 $\text{mAh} \cdot \text{g}^{-1}$ at 0.1 $\text{A} \cdot \text{g}^{-1}$ | 97% retention after<br>2000 cycles at 5 $\text{A} \cdot \text{g}^{-1}$ | [2]        |
| $(\text{NH}_4)_2\text{V}_{10}\text{O}_{25} \cdot 8\text{H}_2\text{O}$ | 376 $\text{mAh} \cdot \text{g}^{-1}$ at 0.3 $\text{A} \cdot \text{g}^{-1}$ | 93% retention after                                                    | [3]        |

|                                                                                    |                                                    |                                                                                |     |
|------------------------------------------------------------------------------------|----------------------------------------------------|--------------------------------------------------------------------------------|-----|
|                                                                                    |                                                    | 1000 cycles at 10 A·g <sup>-1</sup>                                            |     |
| VO <sub>2</sub> (D)                                                                | 408 mAh·g <sup>-1</sup> at 0.1 A·g <sup>-1</sup>   | 66.5% retention after<br>3000 cycles at 3 A·g <sup>-1</sup>                    | [4] |
| V <sub>6</sub> O <sub>13</sub>                                                     | 360 mAh·g <sup>-1</sup> at 0.2 A·g <sup>-1</sup>   | 92% retention after<br>2000 cycles at 24 A·g <sup>-1</sup>                     | [5] |
| VO <sub>2</sub> (M)                                                                | 248 mAh·g <sup>-1</sup> at 2 A·g <sup>-1</sup>     | 84.5% retention after<br>5000 cycles at 20 A·g <sup>-1</sup>                   | [6] |
| V <sub>10</sub> O <sub>24</sub> ·12H <sub>2</sub> O                                | 327 mAh·g <sup>-1</sup> at 0.1 A·g <sup>-1</sup>   | 115 mAh·g <sup>-1</sup> retention after<br>3000 cycles at 1 A·g <sup>-1</sup>  | [7] |
| (NH <sub>4</sub> ) <sub>2</sub> V <sub>10</sub> O <sub>25</sub> ·8H <sub>2</sub> O | 417 mAh·g <sup>-1</sup> at 0.1 A·g <sup>-1</sup>   | 252 mAh·g <sup>-1</sup> retention after<br>100 cycles at 0.2 A·g <sup>-1</sup> | [8] |
| V <sub>2</sub> O <sub>5</sub> yolk-shell                                           | 410 mAh·g <sup>-1</sup> at 0.1 A·g <sup>-1</sup>   | 80% retention after<br>1000 cycles at 5 A·g <sup>-1</sup>                      | [9] |
| This work                                                                          | 418.5 mAh·g <sup>-1</sup> at 0.1 A·g <sup>-1</sup> | 81.2% retention after<br>500 cycles at 2 A·g <sup>-1</sup>                     | /   |

**Table S2.** Inductively coupled plasma optical emission spectroscopy (ICP-OES) characterization. The data were collected by analyzing the CVNO material.

| Calcium<br>Concentration<br>(mg·L <sup>-1</sup> )/(mmol·L <sup>-1</sup> ) | Vanadium<br>Concentration<br>(mg·L <sup>-1</sup> )/(mmol·L <sup>-1</sup> ) | Ca/V   | Calcium<br>Content (wt%) | Vanadium<br>Content (wt%) |
|---------------------------------------------------------------------------|----------------------------------------------------------------------------|--------|--------------------------|---------------------------|
| 2.705/0.0676                                                              | 768.2/15.06                                                                | 0.01/2 | 0.16%                    | 46.73%                    |
| 2.706/0.0677                                                              | 768.8/15.07                                                                | 0.01/2 | 0.16%                    | 46.76%                    |

**Table S3.** Specific surface areas.

| materials                     | Specific Surface Areas             |
|-------------------------------|------------------------------------|
|                               | (m <sup>2</sup> ·g <sup>-1</sup> ) |
| V <sub>2</sub> O <sub>5</sub> | 17.700                             |
| CVO                           | 72.672                             |
| VNO                           | 196.499                            |
| CVNO                          | 44.192                             |

## References

- [1] C. Xia, J. Guo, P. Li, X.X. Zhang, H.N. Alshareef, Highly stable aqueous zinc-ion storage using a layered calcium vanadium oxide bronze cathode, *Angew. Chem. Int. Edit.* 57 (2018) 3943-3948.
- [2] F. Ming, H. Liang, Y. Lei, S. Kandambeth, M. Eddaoudi, H.N. Alshareef, Layered Mg<sub>x</sub>V<sub>2</sub>O<sub>5</sub>·n H<sub>2</sub>O as cathode material for high-performance aqueous zinc ion batteries, *ACS Energy Lett.* 3 (2018) 2602-2609.
- [3] B.Y. Tang, J. Zhou, G.Z. Fang, S. Guo, X. Guo, L.T. Shan, Y. Tang, S.Q. Liang, Structural modification of V<sub>2</sub>O<sub>5</sub> as high-performance aqueous zinc-ion battery cathode, *J. Electrochem. Soc.* 166 (2019) A480-A486.
- [4] L.L. Chen, Z.H. Yang, Y.G. Huang, Monoclinic VO<sub>2</sub>(D) hollow nanospheres with super-long cycle life for aqueous zinc ion batteries, *Nanoscale* 11 (2019) 13032-13039.
- [5] J. Shin, D.S. Choi, H.J. Lee, Y. Jung, J.W. Choi, Hydrated intercalation for high-performance aqueous zinc ion batteries, *Adv. Energy Mater.* 9 (2019) 1900083.
- [6] L. Zhang, L. Miao, B. Zhang, J. Wang, J. Liu, Q. Tan, H. Wan, J. Jiang, A durable VO<sub>2</sub>(M)/Zn battery with ultrahigh rate capability enabled by pseudocapacitive proton insertion, *J. Mater. Chem. A* 8 (2020) 1731-1740.
- [7] W. Liu, L. Dong, B. Jiang, Y. Huang, X. Wang, C. Xu, Z. Kang, J. Mou, F. Kang, Layered vanadium oxides with proton and zinc ion insertion for zinc ion batteries, *Electrochim. Acta*

320 (2019) 134565.

- [8] H. Jiang, Y. Zhang, Z. Pan, L. Xu, J. Zheng, Z. Gao, T. Hu, C. Meng, Facile hydrothermal synthesis and electrochemical properties of  $(\text{NH}_4)_2\text{V}_{10}\text{O}_{25}\cdot 8\text{H}_2\text{O}$  nanobelts for high-performance aqueous zinc ion batteries, *Electrochim. Acta* 332 (2020) 135506.
- [9] R. Li, H. Zhang, Q. Zheng, X. Li, Porous  $\text{V}_2\text{O}_5$  yolk-shell microspheres for zinc ion battery cathodes: activation responsible for enhanced capacity and rate performance, *J. Mater. Chem. A* 8 (2020) 5186-5193.
